# Supplementary material for: Whole-Genome Sequencing and Comparative Genome Analysis Provided Insight into the Predatory Features and Genetic Diversity of Two Bdellovibrio Species Isolated from Soil
Source: Int J Genomics. 2018 Apr 10;2018:9402073. doi: 10.1155/2018/9402073 (PMC5941755; doi:10.1155/2018/9402073)
Supplement: Supplementary 2 — Additional files 2a and b: predicted genomic islands in Bdellovibrio spp. SKB1291214 and SSB218315, respectively. [file 9402073.f2.xls]

## Sheet: a. GEIs-SKB1291214
Additional file 2a: Predicted genomic islands in Bdellovibrio sp. SKB1291214 using IslandViewer4 online program
Island start	Island end	Length	Method	Gene name	Gene ID	Locus	Gene start	Gene end	Strand	Product	GC %
1769786	1780681	10895	Predicted by at least one method			B9G69_09085	1769786	1770190	-1	flagellar export chaperone FliS	41.2
1769786	1780681	10895	Predicted by at least one method			B9G69_09090	1770241	1771611	-1	flagellar hook associated protein	44.8
1769786	1780681	10895	Predicted by at least one method			B9G69_09095	1771821	1772192	-1	hypothetical protein
1769786	1780681	10895	Predicted by at least one method			B9G69_09100	1772350	1773183	-1	flagellin	48.1
1769786	1780681	10895	Predicted by at least one method			B9G69_09105	1773967	1774521	1	hypothetical protein
1769786	1780681	10895	Predicted by at least one method			B9G69_09110	1775006	1775833	-1	flagellin	48.1
1769786	1780681	10895	Predicted by at least one method			B9G69_09115	1776308	1777090	-1	hypothetical protein
1769786	1780681	10895	Predicted by at least one method			B9G69_09120	1777330	1780032	1	hybrid sensor histidine kinase/response regulator	44.4
1769786	1780681	10895	Predicted by at least one method			B9G69_09125	1780040	1780681	-1	thiamine ABC transporter ATP-binding protein	45.3
1769786	1780681	10895	Predicted by at least one method			B9G69_09130	1780653	1782113	-1	thiamine biosynthesis protein ThiP
1834620	1844914	10294	Predicted by at least one method			B9G69_09410	1834620	1835579	1	murein transglycosylase	45.2
1834620	1844914	10294	Predicted by at least one method			B9G69_09415	1835612	1836799	1	aspartate kinase
1834620	1844914	10294	Predicted by at least one method			B9G69_09420	1836922	1838166	-1	hypothetical protein
1834620	1844914	10294	Predicted by at least one method			B9G69_09425	1838438	1838923	1	glutathione peroxidase	43.4
1834620	1844914	10294	Predicted by at least one method			B9G69_09430	1839098	1839394	1	hypothetical protein
1834620	1844914	10294	Predicted by at least one method			B9G69_09435	1839553	1839963	1	hypothetical protein
1834620	1844914	10294	Predicted by at least one method			B9G69_09440	1839967	1840380	-1	hypothetical protein
1834620	1844914	10294	Predicted by at least one method			B9G69_09445	1840722	1841357	1	hypothetical protein
1834620	1844914	10294	Predicted by at least one method			B9G69_09450	1841407	1841646	-1	hypothetical protein
1834620	1844914	10294	Predicted by at least one method			B9G69_09455	1841798	1842340	1	hypothetical protein
1834620	1844914	10294	Predicted by at least one method			B9G69_09460	1842722	1843864	-1	recombinase RecA	44.9
1834620	1844914	10294	Predicted by at least one method			B9G69_09465	1843946	1844434	-1	damage-inducible protein CinA	49.1
1834620	1844914	10294	Predicted by at least one method			B9G69_09470	1844435	1844914	-1	phosphatidylglycerophosphatase A	44.8
2288949	2354273	65324	Predicted by at least one method			B9G69_11655	2288949	2289320	1	molecular chaperone DnaK
2288949	2354273	65324	Predicted by at least one method			B9G69_11660	2289502	2289873	1	hypothetical protein
2288949	2354273	65324	Predicted by at least one method			B9G69_11665	2290023	2292428	1	endopeptidase La
2288949	2354273	65324	Predicted by at least one method			B9G69_11670	2292612	2293133	1	hypothetical protein
2288949	2354273	65324	Predicted by at least one method			B9G69_11675	2293066	2293920	-1	hypothetical protein
2288949	2354273	65324	Predicted by at least one method			B9G69_11680	2293996	2294421	-1	hypothetical protein
2288949	2354273	65324	Predicted by at least one method			B9G69_11685	2294748	2295953	1	hypothetical protein
2288949	2354273	65324	Predicted by at least one method			B9G69_11690	2296162	2297622	-1	NADH-quinone oxidoreductase subunit N	45.4
2288949	2354273	65324	Predicted by at least one method			B9G69_11695	2297622	2299214	-1	Fe-S-binding domain-containing protein
2288949	2354273	65324	Predicted by at least one method			B9G69_11700	2299218	2301149	-1	NADH-quinone oxidoreductase subunit L	46.6
2288949	2354273	65324	Predicted by at least one method			B9G69_11705	2301155	2301478	-1	NADH-quinone oxidoreductase subunit K	43.8
2288949	2354273	65324	Predicted by at least one method			B9G69_11710	2301468	2302004	-1	NADH-quinone oxidoreductase subunit J	47.1
2288949	2354273	65324	Predicted by at least one method			B9G69_11715	2302015	2303172	-1	NADH-quinone oxidoreductase subunit H	45.8
2288949	2354273	65324	Predicted by at least one method			B9G69_11720	2303176	2303544	-1	NADH-quinone oxidoreductase subunit A	41.2
2288949	2354273	65324	Predicted by at least one method			B9G69_11725	2303664	2307194	1	transcription-repair coupling factor	44.6
2288949	2354273	65324	Predicted by at least one method			B9G69_11730	2307191	2307985	-1	hypothetical protein
2288949	2354273	65324	Predicted by at least one method			B9G69_11735	2308043	2309719	1	beta-hexosaminidase	42.7
2288949	2354273	65324	Predicted by at least one method			B9G69_11740	2309722	2311254	-1	hypothetical protein
2288949	2354273	65324	Predicted by at least one method			B9G69_11745	2311266	2313683	-1	ATP-dependent helicase	43.8
2288949	2354273	65324	Predicted by at least one method			B9G69_11750	2313701	2314801	-1	radical SAM protein	45.8
2288949	2354273	65324	Predicted by at least one method			B9G69_11755	2314918	2315337	-1	ATP synthase F1 subunit epsilon	43.8
2288949	2354273	65324	Predicted by at least one method			B9G69_11760	2315398	2316804	-1	F0F1 ATP synthase subunit beta	46.2
2288949	2354273	65324	Predicted by at least one method			B9G69_11765	2316816	2317703	-1	ATP synthase F1 subunit gamma	43.6
2288949	2354273	65324	Predicted by at least one method			B9G69_11770	2317716	2319239	-1	F0F1 ATP synthase subunit alpha	45.5
2288949	2354273	65324	Predicted by at least one method			B9G69_11775	2319242	2319790	-1	ATP synthase F1 subunit delta	42.8
2288949	2354273	65324	Predicted by at least one method			B9G69_11780	2319787	2320356	-1	hypothetical protein
2288949	2354273	65324	Predicted by at least one method			B9G69_11785	2320371	2320805	-1	hypothetical protein
2288949	2354273	65324	Predicted by at least one method			B9G69_11790	2320919	2321284	-1	hypothetical protein
2288949	2354273	65324	Predicted by at least one method			B9G69_11795	2321275	2322306	-1	chromosome partitioning protein	44.3
2288949	2354273	65324	Predicted by at least one method			B9G69_11800	2322377	2323129	-1	chromosome partitioning protein	43.5
2288949	2354273	65324	Predicted by at least one method			B9G69_11805	2323258	2323707	1	hypothetical protein
2288949	2354273	65324	Predicted by at least one method			B9G69_11810	2323847	2324518	-1	16S rRNA (guanine(527)-N(7))-methyltransferase RsmG
2288949	2354273	65324	Predicted by at least one method			B9G69_11815	2324505	2326400	-1	tRNA uridine-5-carboxymethylaminomethyl(34) synthesis enzyme MnmG	44.5
2288949	2354273	65324	Predicted by at least one method			B9G69_11820	2326404	2327828	-1	tRNA uridine-5-carboxymethylaminomethyl(34) synthesis GTPase MnmE	43.6
2288949	2354273	65324	Predicted by at least one method			B9G69_11825	2327845	2328408	-1	hypothetical protein
2288949	2354273	65324	Predicted by at least one method			B9G69_11830	2328444	2330084	-1	membrane protein insertase
2288949	2354273	65324	Predicted by at least one method			B9G69_11835	2330062	2330313	-1	membrane protein insertion efficiency factor YidD
2288949	2354273	65324	Predicted by at least one method			B9G69_11840	2330306	2330665	-1	ribonuclease P protein component	45.3
2288949	2354273	65324	Predicted by at least one method			B9G69_11845	2330655	2330804	-1	50S ribosomal protein L34	44.7
2288949	2354273	65324	Predicted by at least one method			B9G69_11850	2331020	2332441	1	chromosomal replication initiator protein DnaA	43.4
2288949	2354273	65324	Predicted by at least one method			B9G69_11855	2332677	2333783	1	DNA polymerase III subunit beta	37.8
2288949	2354273	65324	Predicted by at least one method			B9G69_11860	2333783	2334907	1	DNA replication and repair protein RecF	37.8
2288949	2354273	65324	Predicted by at least one method			B9G69_11865	2334995	2337424	1	DNA topoisomerase (ATP-hydrolyzing) subunit B	47
2288949	2354273	65324	Predicted by at least one method			B9G69_11870	2337448	2339937	1	DNA gyrase subunit A	44.9
2288949	2354273	65324	Predicted by at least one method			B9G69_11875	2339939	2340736	1	hypothetical protein
2288949	2354273	65324	Predicted by at least one method			B9G69_11880	2340736	2340960	1	hypothetical protein
2288949	2354273	65324	Predicted by at least one method			B9G69_11885	2340961	2341332	1	hypothetical protein
2288949	2354273	65324	Predicted by at least one method			B9G69_11890	2341307	2342011	1	ATP synthase F0 subunit A	43.4
2288949	2354273	65324	Predicted by at least one method			B9G69_11895	2342049	2342357	1	hypothetical protein
2288949	2354273	65324	Predicted by at least one method			B9G69_11900	2342707	2344074	-1	phosphomannomutase	45.4
2288949	2354273	65324	Predicted by at least one method			B9G69_11905	2344124	2345080	-1	pyridoxal phosphate biosynthetic protein
2288949	2354273	65324	Predicted by at least one method			B9G69_11910	2345073	2346017	-1	survival protein SurA	39.5
2288949	2354273	65324	Predicted by at least one method			B9G69_11915	2346010	2346978	-1	parvulin peptidyl-prolyl isomerase	41.6
2288949	2354273	65324	Predicted by at least one method			B9G69_11920	2346991	2347800	-1	hypothetical protein
2288949	2354273	65324	Predicted by at least one method			B9G69_11925	2347854	2348507	-1	hypothetical protein
2288949	2354273	65324	Predicted by at least one method			B9G69_11930	2348510	2349478	-1	electron transfer flavoprotein subunit alpha	43.9
2288949	2354273	65324	Predicted by at least one method			B9G69_11935	2349488	2350261	-1	electron transfer flavoprotein subunit beta	46.5
2288949	2354273	65324	Predicted by at least one method			B9G69_11940	2350444	2351100	1	cytochrome B subunit
2288949	2354273	65324	Predicted by at least one method		sdhA	B9G69_11945	2351111	2353027	1	succinate dehydrogenase flavoprotein subunit	46.4
2288949	2354273	65324	Predicted by at least one method			B9G69_11950	2353038	2353826	1	succinate dehydrogenase/fumarate reductase iron-sulfur subunit
2288949	2354273	65324	Predicted by at least one method			B9G69_11955	2354028	2354273	1	hypothetical protein
2589080	2603541	14461	Predicted by at least one method			B9G69_13180	2589080	2589448	1	glyoxalase	41
2589080	2603541	14461	Predicted by at least one method			B9G69_13185	2589450	2590382	-1	hypothetical protein
2589080	2603541	14461	Predicted by at least one method			B9G69_13190	2590518	2591063	-1	hypothetical protein
2589080	2603541	14461	Predicted by at least one method			B9G69_13195	2591164	2592249	-1	aldo/keto reductase	43.9
2589080	2603541	14461	Predicted by at least one method			B9G69_13200	2592421	2593368	1	hypothetical protein
2589080	2603541	14461	Predicted by at least one method			B9G69_13205	2593459	2593857	1	hypothetical protein
2589080	2603541	14461	Predicted by at least one method			B9G69_13210	2593931	2594326	1	hypothetical protein
2589080	2603541	14461	Predicted by at least one method			B9G69_13215	2594537	2595775	1	integrase	44
2589080	2603541	14461	Predicted by at least one method			B9G69_13220	2595789	2596382	1	hypothetical protein
2589080	2603541	14461	Predicted by at least one method			B9G69_13225	2596469	2596690	1	hypothetical protein
2589080	2603541	14461	Predicted by at least one method			B9G69_13230	2596683	2598125	1	hypothetical protein
2589080	2603541	14461	Predicted by at least one method			B9G69_13235	2598193	2598702	1	hypothetical protein
2589080	2603541	14461	Predicted by at least one method			B9G69_13240	2598689	2598940	-1	hypothetical protein
2589080	2603541	14461	Predicted by at least one method			B9G69_13245	2598998	2599387	1	hypothetical protein
2589080	2603541	14461	Predicted by at least one method			B9G69_13250	2599430	2599936	-1	hypothetical protein
2589080	2603541	14461	Predicted by at least one method			B9G69_13255	2599995	2600183	1	hypothetical protein
2589080	2603541	14461	Predicted by at least one method			B9G69_13260	2600196	2601134	1	hypothetical protein
2589080	2603541	14461	Predicted by at least one method			B9G69_13270	2602030	2603541	1	hypothetical protein
2589080	2603541	14461	Predicted by at least one method			B9G69_13275	2603538	2604200	-1	hypothetical protein
2593459	2601134	7675	Predicted by at least one method			B9G69_13205	2593459	2593857	1	hypothetical protein
2593459	2601134	7675	Predicted by at least one method			B9G69_13210	2593931	2594326	1	hypothetical protein
2593459	2601134	7675	Predicted by at least one method			B9G69_13215	2594537	2595775	1	integrase	44
2593459	2601134	7675	Predicted by at least one method			B9G69_13220	2595789	2596382	1	hypothetical protein
2593459	2601134	7675	Predicted by at least one method			B9G69_13225	2596469	2596690	1	hypothetical protein
2593459	2601134	7675	Predicted by at least one method			B9G69_13230	2596683	2598125	1	hypothetical protein
2593459	2601134	7675	Predicted by at least one method			B9G69_13235	2598193	2598702	1	hypothetical protein
2593459	2601134	7675	Predicted by at least one method			B9G69_13240	2598689	2598940	-1	hypothetical protein
2593459	2601134	7675	Predicted by at least one method			B9G69_13245	2598998	2599387	1	hypothetical protein
2593459	2601134	7675	Predicted by at least one method			B9G69_13250	2599430	2599936	-1	hypothetical protein
2593459	2601134	7675	Predicted by at least one method			B9G69_13255	2599995	2600183	1	hypothetical protein
2593459	2601134	7675	Predicted by at least one method			B9G69_13260	2600196	2601134	1	hypothetical protein
3574969	3583534	8565	Predicted by at least one method			B9G69_00030	3574969	3575577	1	phosphatase
3574969	3583534	8565	Predicted by at least one method			B9G69_00035	3575599	3576024	-1	hypothetical protein
3574969	3583534	8565	Predicted by at least one method			B9G69_00040	3576023	3576739	1	hypothetical protein
3574969	3583534	8565	Predicted by at least one method			B9G69_00045	3576758	3577051	1	hypothetical protein
3574969	3583534	8565	Predicted by at least one method			B9G69_00050	3577164	3578414	1	hypothetical protein
3574969	3583534	8565	Predicted by at least one method			B9G69_00055	3578466	3578858	1	hypothetical protein
3574969	3583534	8565	Predicted by at least one method			B9G69_00065	3579035	3580483	-1	competence protein ComM
3574969	3583534	8565	Predicted by at least one method			B9G69_00070	3580568	3581446	-1	integrase	42.7
3574969	3583534	8565	Predicted by at least one method			B9G69_00075	3581574	3582281	-1	hypothetical protein
3574969	3583534	8565	Predicted by at least one method			B9G69_00080	3582391	3583167	-1	hypothetical protein
3574969	3583534	8565	Predicted by at least one method			B9G69_00085	3583313	3583534	1	hypothetical protein
3720010	3734943	14933	Predicted by at least one method			B9G69_17900	3719430	3720015	1	hypothetical protein
3720010	3734943	14933	Predicted by at least one method			B9G69_17905	3720010	3722487	-1	hypothetical protein
3720010	3734943	14933	Predicted by at least one method			B9G69_17910	3722609	3722879	-1	FAD-dependent oxidoreductase
3720010	3734943	14933	Predicted by at least one method			B9G69_18150	3723880	3724395	-1	hypothetical protein
3720010	3734943	14933	Predicted by at least one method			B9G69_18155	3725436	3726254	-1	hypothetical protein
3720010	3734943	14933	Predicted by at least one method			B9G69_18160	3726284	3726709	-1	hypothetical protein
3720010	3734943	14933	Predicted by at least one method			B9G69_18285	3727755	3728176	1	thiosulfate reductase
3720010	3734943	14933	Predicted by at least one method			B9G69_18290	3728173	3728928	1	hypothetical protein
3720010	3734943	14933	Predicted by at least one method			B9G69_18295	3729031	3729786	1	hypothetical protein
3720010	3734943	14933	Predicted by at least one method			B9G69_18300	3729779	3730885	-1	PrpF family protein
3720010	3734943	14933	Predicted by at least one method			B9G69_18305	3730964	3732004	-1	cytochrome BD ubiquinol oxidase subunit II	45
3720010	3734943	14933	Predicted by at least one method			B9G69_18310	3732001	3733311	-1	cytochrome ubiquinol oxidase subunit I	47.1
3720010	3734943	14933	Predicted by at least one method			B9G69_18315	3733437	3734672	-1	hypothetical protein
3720010	3734943	14933	Predicted by at least one method			B9G69_18320	3734722	3734943	-1	hypothetical protein
3722609	3728176	5567	Predicted by at least one method			B9G69_17910	3722609	3722879	-1	FAD-dependent oxidoreductase
3722609	3728176	5567	Predicted by at least one method			B9G69_18150	3723880	3724395	-1	hypothetical protein
3722609	3728176	5567	Predicted by at least one method			B9G69_18155	3725436	3726254	-1	hypothetical protein
3722609	3728176	5567	Predicted by at least one method			B9G69_18160	3726284	3726709	-1	hypothetical protein
3722609	3728176	5567	Predicted by at least one method			B9G69_18285	3727755	3728176	1	thiosulfate reductase	45.5
3722609	3728176	5567	Predicted by at least one method			B9G69_18290	3728173	3728928	1	hypothetical protein

## Sheet: b. GEIs-SSB218315
Additional file 2b: Predicted genomic islands in Bdellovibrio bacteriovorus SSB218315 using IslandViewer4 online program
Island start	Island end	Length	Method	Gene name	Gene ID	Locus	Gene start	Gene end	Strand	Product	GC %
18080	48077	29997	Predicted by at least one method			B9G79_00005	1	3769537	-1	hypothetical protein
18080	48077	29997	Predicted by at least one method			B9G79_00100	18080	18397	-1	hypothetical protein
18080	48077	29997	Predicted by at least one method			B9G79_00105	18430	19119	-1	ATP synthase F0 subunit A	48.1
18080	48077	29997	Predicted by at least one method			B9G79_00110	19109	19465	-1	hypothetical protein
18080	48077	29997	Predicted by at least one method			B9G79_00115	19462	19698	-1	hypothetical protein
18080	48077	29997	Predicted by at least one method			B9G79_00120	19698	20495	-1	hypothetical protein
18080	48077	29997	Predicted by at least one method			B9G79_00125	20497	22980	-1	DNA gyrase subunit A	50.1
18080	48077	29997	Predicted by at least one method			B9G79_00130	23004	25424	-1	DNA topoisomerase (ATP-hydrolyzing) subunit B	49.5
18080	48077	29997	Predicted by at least one method			B9G79_00135	25510	26634	-1	DNA replication and repair protein RecF	47
18080	48077	29997	Predicted by at least one method			B9G79_00140	26634	27740	-1	DNA polymerase III subunit beta	43.1
18080	48077	29997	Predicted by at least one method			B9G79_00145	27973	29388	-1	chromosomal replication initiator protein DnaA	48.7
18080	48077	29997	Predicted by at least one method			B9G79_00150	29572	29721	1	50S ribosomal protein L34
18080	48077	29997	Predicted by at least one method			B9G79_00155	29708	30070	1	ribonuclease P protein component	41.3
18080	48077	29997	Predicted by at least one method			B9G79_00160	30012	30308	1	membrane protein insertion efficiency factor YidD
18080	48077	29997	Predicted by at least one method			B9G79_00165	30292	31911	1	membrane protein insertase
18080	48077	29997	Predicted by at least one method			B9G79_00170	31963	32526	1	hypothetical protein
18080	48077	29997	Predicted by at least one method			B9G79_00175	32537	33976	1	tRNA uridine-5-carboxymethylaminomethyl(34) synthesis GTPase MnmE
18080	48077	29997	Predicted by at least one method			B9G79_00180	33979	35907	1	tRNA uridine-5-carboxymethylaminomethyl(34) synthesis enzyme MnmG
18080	48077	29997	Predicted by at least one method			B9G79_00185	35858	36523	1	16S rRNA (guanine(527)-N(7))-methyltransferase RsmG
18080	48077	29997	Predicted by at least one method			B9G79_00190	36552	37094	-1	hypothetical protein
18080	48077	29997	Predicted by at least one method			B9G79_00195	37174	37986	1	chromosome partitioning protein	46.7
18080	48077	29997	Predicted by at least one method			B9G79_00200	38001	39011	1	chromosome partitioning protein	48.6
18080	48077	29997	Predicted by at least one method			B9G79_00205	39002	39367	1	hypothetical protein
18080	48077	29997	Predicted by at least one method			B9G79_00210	39462	39896	1	hypothetical protein
18080	48077	29997	Predicted by at least one method			B9G79_00215	39905	40468	1	hypothetical protein
18080	48077	29997	Predicted by at least one method			B9G79_00220	40473	41021	1	ATP synthase F1 subunit delta	46.8
18080	48077	29997	Predicted by at least one method			B9G79_00225	41024	42547	1	F0F1 ATP synthase subunit alpha	47.6
18080	48077	29997	Predicted by at least one method			B9G79_00230	42560	43447	1	ATP synthase F1 subunit gamma	44.8
18080	48077	29997	Predicted by at least one method			B9G79_00235	43459	44865	1	F0F1 ATP synthase subunit beta	50.2
18080	48077	29997	Predicted by at least one method			B9G79_00240	44886	45308	1	ATP synthase F1 subunit epsilon	49.2
18080	48077	29997	Predicted by at least one method			B9G79_00245	45369	47045	-1	beta-hexosaminidase	52.9
18080	48077	29997	Predicted by at least one method			B9G79_00250	47100	48077	1	hypothetical protein
18080	48077	29997	Predicted by at least one method			B9G79_00255	48074	51592	-1	transcription-repair coupling factor	50.9
614287	618923	4636	Predicted by at least one method			B9G79_00005	1	3769537	-1	hypothetical protein
614287	618923	4636	Predicted by at least one method			B9G79_03080	614287	618923	-1	peptidase S74
1082291	1090906	8615	Predicted by at least one method			B9G79_00005	1	3769537	-1	hypothetical protein
1082291	1090906	8615	Predicted by at least one method			B9G79_05280	1082291	1082785	1	hypothetical protein
1082291	1090906	8615	Predicted by at least one method			B9G79_05285	1082862	1083980	-1	hypothetical protein
1082291	1090906	8615	Predicted by at least one method			B9G79_05290	1083994	1084818	-1	hypothetical protein
1082291	1090906	8615	Predicted by at least one method			B9G79_05295	1085328	1085600	1	hypothetical protein
1082291	1090906	8615	Predicted by at least one method			B9G79_05300	1085604	1085816	1	hypothetical protein
1082291	1090906	8615	Predicted by at least one method			B9G79_05305	1086002	1086274	1	transcriptional regulator
1082291	1090906	8615	Predicted by at least one method			B9G79_05310	1086545	1086790	1	hypothetical protein
1082291	1090906	8615	Predicted by at least one method			B9G79_05315	1086802	1087206	1	hypothetical protein
1082291	1090906	8615	Predicted by at least one method			B9G79_05320	1087241	1087687	-1	hypothetical protein
1082291	1090906	8615	Predicted by at least one method			B9G79_05325	1087655	1088845	1	hypothetical protein
1082291	1090906	8615	Predicted by at least one method			B9G79_05330	1088902	1089375	-1	hypothetical protein
1082291	1090906	8615	Predicted by at least one method			B9G79_05335	1089750	1089965	1	hypothetical protein
1082291	1090906	8615	Predicted by at least one method			B9G79_05345	1090580	1090906	-1	septation protein SpoVG	51.7
2172097	2177707	5610	Predicted by at least one method			B9G79_00005	1	3769537	-1	hypothetical protein
2172097	2177707	5610	Predicted by at least one method			B9G79_10495	2172097	2172690	1	hypothetical protein
2172097	2177707	5610	Predicted by at least one method			B9G79_10500	2172732	2173292	1	lipid carrier--UDP-N-acetylgalactosaminyltransferase	47.8
2172097	2177707	5610	Predicted by at least one method			B9G79_10505	2173292	2174161	1	hypothetical protein
2172097	2177707	5610	Predicted by at least one method			B9G79_10510	2174706	2176013	1	hypothetical protein
2172097	2177707	5610	Predicted by at least one method			B9G79_10515	2176017	2177252	1	hypothetical protein
2172097	2177707	5610	Predicted by at least one method			B9G79_10520	2177228	2177707	-1	hypothetical protein
2508783	2517457	8674	Predicted by at least one method			B9G79_00005	1	3769537	-1	hypothetical protein
2508783	2517457	8674	Predicted by at least one method			B9G79_12025	2508783	2509316	-1	gamma-glutamylcyclotransferase
2508783	2517457	8674	Predicted by at least one method			B9G79_12030	2509579	2510330	1	amino acid ABC transporter	49.7
2508783	2517457	8674	Predicted by at least one method			B9G79_12035	2510573	2511214	1	hypothetical protein
2508783	2517457	8674	Predicted by at least one method			B9G79_12040	2511264	2511815	-1	hypothetical protein
2508783	2517457	8674	Predicted by at least one method			B9G79_12045	2512202	2512501	-1	hypothetical protein
2508783	2517457	8674	Predicted by at least one method			B9G79_12050	2512597	2512902	-1	hypothetical protein
2508783	2517457	8674	Predicted by at least one method			B9G79_12055	2512920	2513570	1	hypothetical protein
2508783	2517457	8674	Predicted by at least one method			B9G79_12060	2513544	2514446	-1	hypothetical protein
2508783	2517457	8674	Predicted by at least one method			B9G79_12065	2514775	2515518	1	hypothetical protein
2508783	2517457	8674	Predicted by at least one method			B9G79_12070	2515762	2515974	1	hypothetical protein
2508783	2517457	8674	Predicted by at least one method			B9G79_12075	2515967	2516428	1	hypothetical protein
2508783	2517457	8674	Predicted by at least one method			B9G79_12080	2516747	2517457	1	hypothetical protein
