# Supplementary material for: Whole-Genome Sequencing and Comparative Genome Analysis Provided Insight into the Predatory Features and Genetic Diversity of Two Bdellovibrio Species Isolated from Soil
Source: Int J Genomics. 2018 Apr 10;2018:9402073. doi: 10.1155/2018/9402073 (PMC5941755; doi:10.1155/2018/9402073)
Supplement: Supplementary 3 — Additional file 3: pairwise evolutionary distance among Bdellovibrio spp. [file 9402073.f3.xls]

## Sheet: MatrixOutput
Additional file 3: Pairwise evolutionary distance among Bdellovibrio spp. constructed in MEGA© 6.0 software using Kimura 2- parameter model with 1000 bootstrap replications.
AF148941.1_B_bacteriovorus_TRA2
AF148938.1_B_bacteriovorus_BEP2	0.0710755
AF148939.1_B_bacteriovorus_BRP4	0.0710755	0
B_bacteriovorus_SSB218315	0.0684889	0.0300447	0.0300447
B_bacteriovorus_SKB1291214	0.0847314	0.034338	0.034338	0.042957
B_bacteriovorus_W	0.0904546	0.0360075	0.0360075	0.0447556	0.0508353
B_bacteriovorus_Tiberius	0.0729796	0.0343071	0.0343071	0.00408949	0.0472955	0.0482673
B_bacteriovorus_RO	0.0774741	0.033419	0.033419	0.0283579	0.0325398	0.0438152	0.030919
B_bacteriovorus_HD100	0.0693758	0.0308897	0.0308897	0.00081616	0.0438152	0.0447787	0.00326998	0.0275161
B_bacteriovorus_109J	0.0693758	0.0308897	0.0308897	0.00081616	0.0438152	0.0447787	0.00326998	0.0275161	0
B_bacteriovorus_EC13	0.0710755	0	0	0.0300447	0.034338	0.0360075	0.0343071	0.033419	0.0308897	0.0308897
B_bacteriovorus_BER2	0.0710755	0	0	0.0300447	0.034338	0.0360075	0.0343071	0.033419	0.0308897	0.0308897	0
B_exovorus_JSS_NR_102876.1	0.0934017	0.080353	0.080353	0.0722523	0.0923432	0.0850888	0.0749846	0.0832144	0.0713645	0.0713645	0.080353	0.080353
Bacteriovorax_stolpii_DSM_12778_NR_042023.1	0.194304	0.220876	0.220876	0.212837	0.217303	0.214174	0.212903	0.224333	0.211775	0.211775	0.220876	0.220876	0.207475
Peredibacter_starrii_A3.12_NR_024943.1	0.197432	0.214841	0.214841	0.213775	0.220517	0.217235	0.219247	0.22166	0.214841	0.214841	0.214841	0.214841	0.210523	0.11875
Halobacteriovorax_marinus_SJ_NR_102485.1	0.202285	0.218585	0.218585	0.210714	0.214035	0.217444	0.216166	0.22549	0.211775	0.211775	0.218585	0.218585	0.211979	0.116749	0.135533
Aquifex_aeolicus_VF5_NR_075056.1	0.313846	0.338392	0.338392	0.34373	0.350738	0.340678	0.343621	0.345942	0.344989	0.344989	0.338392	0.338392	0.332904	0.342364	0.351208	0.336738
Thermotoga_maritima_MSB-8_NR_029163.1	0.258657	0.270259	0.270259	0.270334	0.288727	0.277477	0.272557	0.279053	0.270259	0.270259	0.270259	0.270259	0.26883	0.271716	0.300237	0.290287	0.224107
Uncultured_Bdellovibrio_sp_clone_12_L_106_KP183074.1	0.0865682	0.0360536	0.0360536	0.0464537	0.00821761	0.0543753	0.0508134	0.0342484	0.0473153	0.0473153	0.0360536	0.0360536	0.0980129	0.2241	0.225032	0.218513	0.353399	0.293711
Halobacteriovorax_litoralis_strain_JS5_NR_028724	0.208343	0.228208	0.228208	0.224696	0.227194	0.230381	0.225778	0.23168	0.224634	0.224634	0.228208	0.228208	0.211355	0.117323	0.147368	0.0675807	0.344273	0.305103	0.234085

## Sheet: Caption
Table. Estimates of Evolutionary Divergence between Sequences
The number of base substitutions per site from between sequences are shown. Standard error estimate(s) are shown above the diagonal. Analyses were conducted using the Kimura 2-parameter model [1]. The analysis involved 20 nucleotide sequences. Codon positions included were 1st+2nd+3rd+Noncoding. All positions containing gaps and missing data were eliminated. There were a total of 1226 positions i…
1. Kimura M. (1980). A simple method for estimating evolutionary rate of base substitutions through comparative studies of nucleotide sequences. Journal of Molecular Evolution 16:111-120.
2. Tamura K., Stecher G., Peterson D., Filipski A., and Kumar S. (2013). MEGA6: Molecular Evolutionary Genetics Analysis version 6.0. Molecular Biology and Evolution30: 2725-2729.
Disclaimer: Although utmost care has been taken to ensure the correctness of the caption, the caption text is provided "as is" without any warranty of any kind. Authors advise the user to carefully check the caption prior to its use for any purpose and report any errors or problems to the authors immediately (www.megasoftware.net). In no event shall the authors and their employers be liable for a…
